# Supplementary material for: Aging augments obesity-induced thymic involution and peripheral T cell exhaustion altering the “obesity paradox”
Source: PubMed Central journal article supplement (PMC9910174; doi:10.3389/fimmu.2022.1012016), 2023-01-26
Supplement: DataSheet_1.pdf [file DataSheet_1.pdf]

**Title: Aging Augments Obesity-Induced Thymic Involution and Peripheral T cell Exhaustion Altering the "Obesity Paradox"**

**Supplemental Figures and Information**

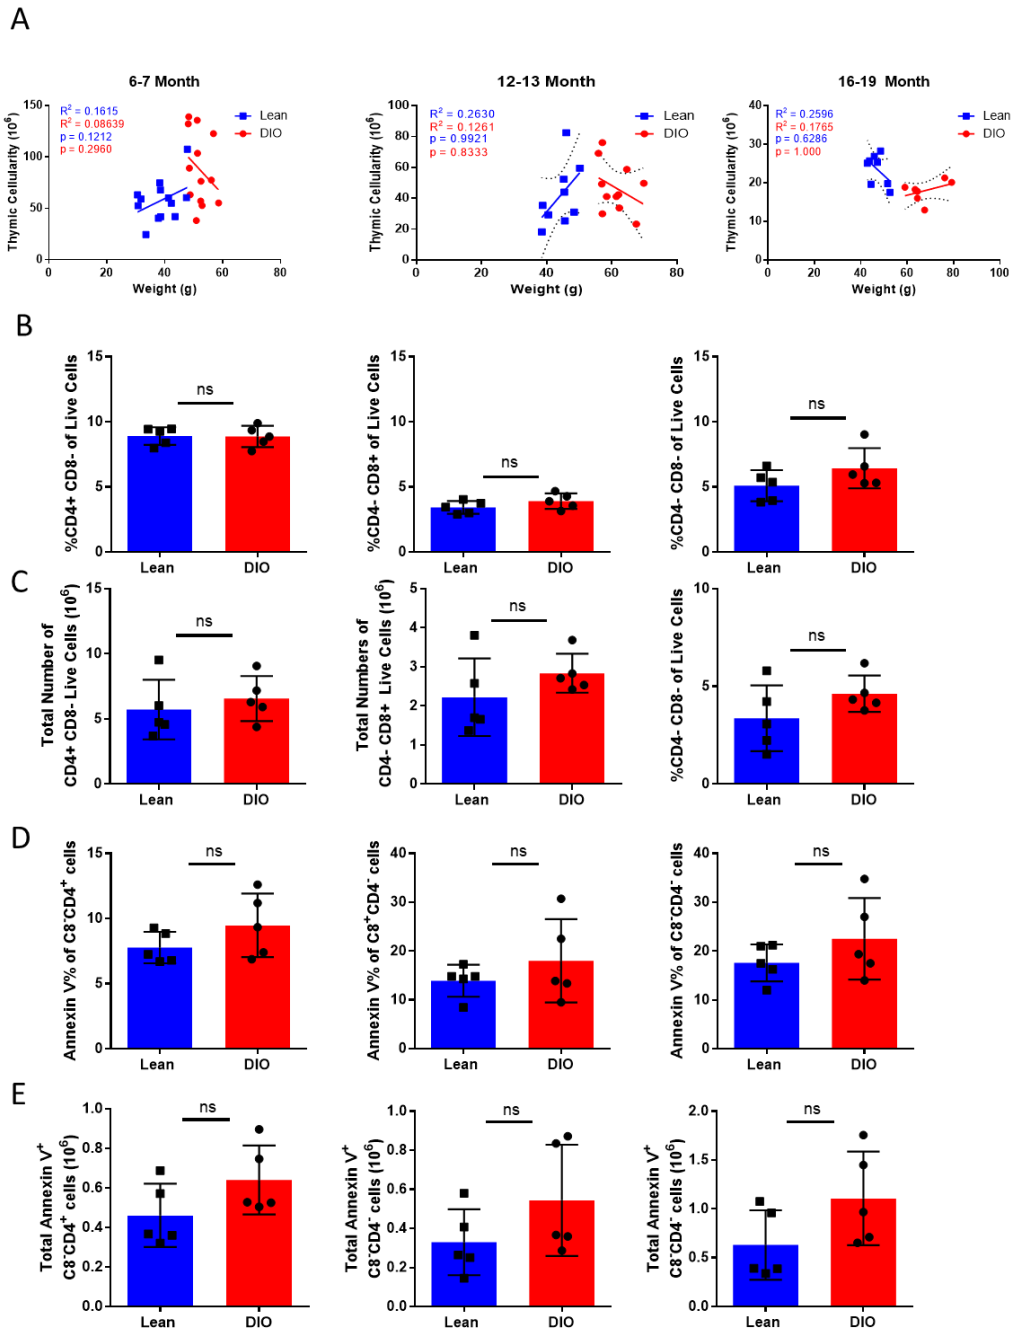

**Supplemental Figure 1: Lean and DIO thymic Cellularity and CD4/CD8 Sub populations.** (A) Thymic cellularity of six-seven, twelve-thirteen-month, or sixteen-nineteen-month male C57BL/6 mice plotted with corresponding total body weight with linear interpolation (B) Lean and DIO thymic sub population percentages assessed via flow cytometry and gated on CD4 single positive, CD8 single positive and CD4/CD8 double negative thymocytes (n = 4-5). (C) Total Numbers of lean and DIO thymic sub populations obtained though assessment of flowcytometry interrogation in combination with overall thymic cellularity (n = 4-5). (E) Depiction of percent Annexin V positive lean and DIO thymic sub populations (n = 4-5). (F) total numbers of Annexin V positive cells of lean and DIO thymic sub populations CD4 single positive, CD8 single positive and CD4/CD8 double negative (n = 4-5). Graphs depict error bars based on standard deviation. Data are representative of at least two independent experiments. Simple linear regression and a runs test was used in (C). Unpaired student T test was used for assessments in (B-F). \*p < 0.05, \*\*p < 0.01, \*\*\*p < 0.001, \*\*\*\*p < 0.0001, ns, not significant.

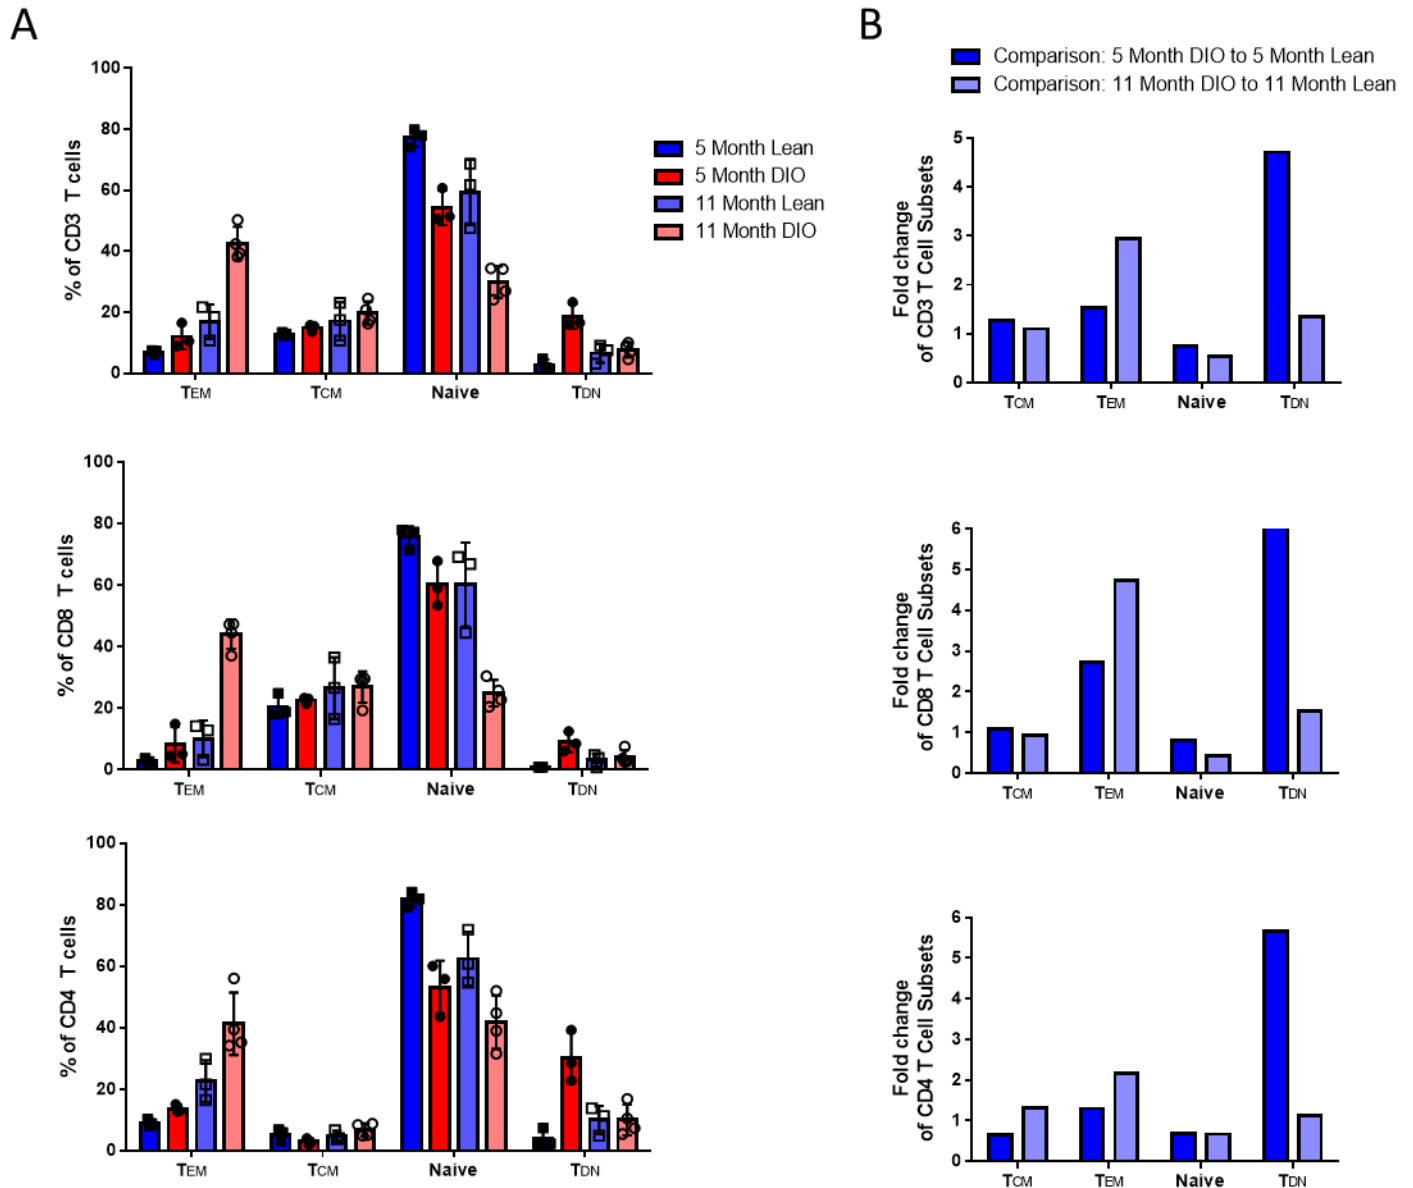

**Supplemental Figure 2: Lean and DIO memory compartments with elevated age.** (A) Flow cytometry staining of CD44 and CD62L +/- frequencies from the peripheral blood of lean control or Diet induce obese (DIO) five and eleven-month-old C57BL/6 mice; percentages of effector memory (CD44+ CD62L-), central memory (CD44+ CD62L+), Naïve (CD44- CD62L+) and double negative (CD44- Cd62L-) T cell memory subsets are displayed (n = 3-4/group). (B) Fold change in respective T cell memory subsets across increases in age in lean and DIO mice. Graphs depict error bars based on standard deviation. Data are representative of at least two independent experiments.

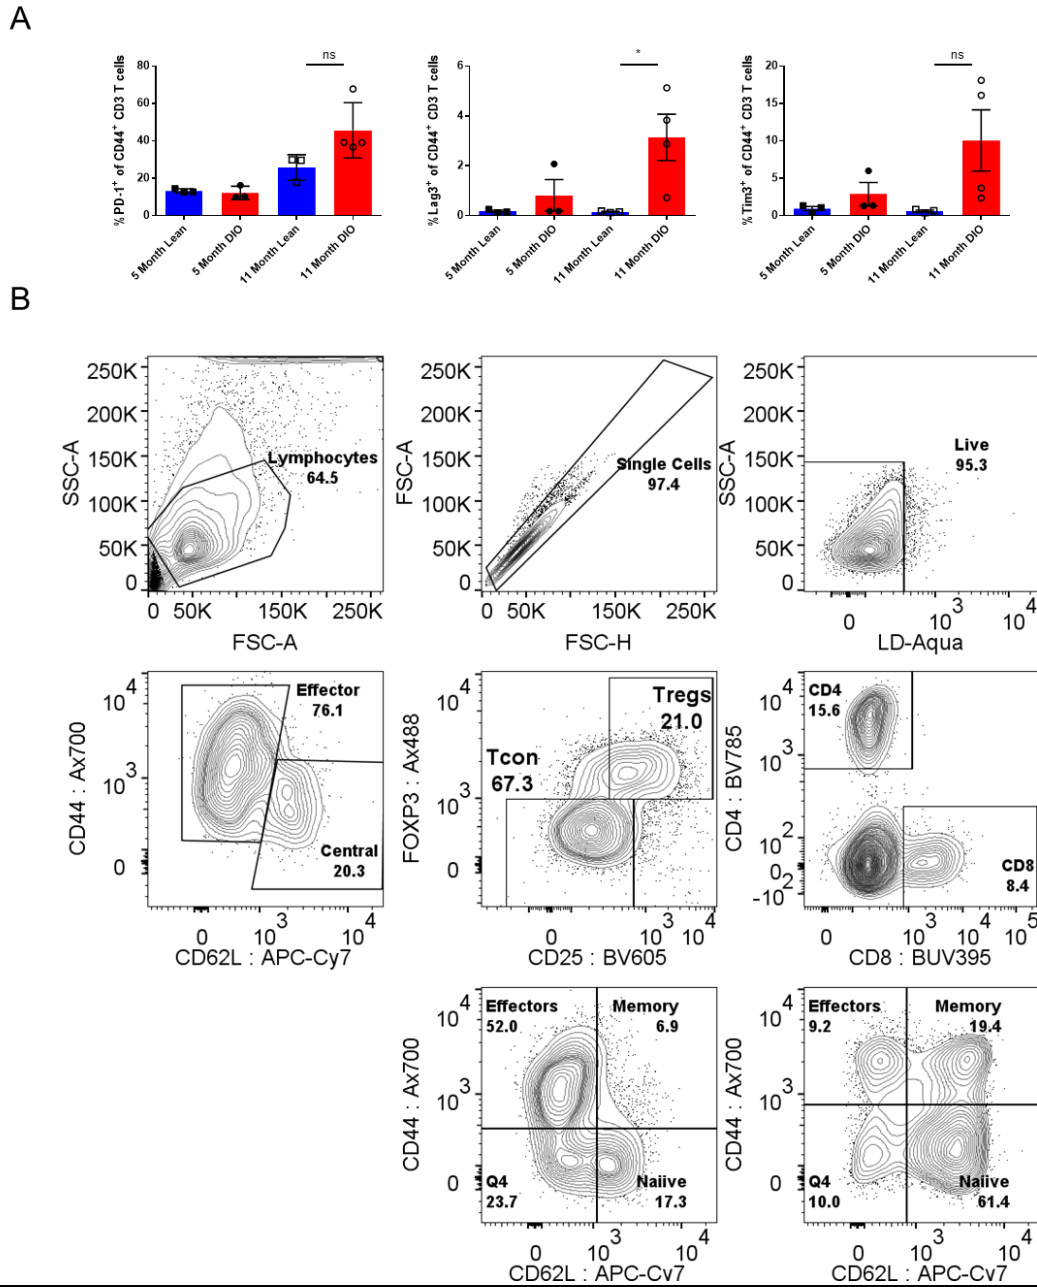

**Supplemental Figure 3: Memory T cells exhibit elevated exhaustive markers.** (A) Flow cytometry frequencies of PD-1<sup>+</sup>, TIM3<sup>+</sup> and Lag3<sup>+</sup> on memory (CD44<sup>+</sup>) CD3 T cells from the peripheral blood of lean control or DIO five and eleven-month-old C57BL/6 mice (n = 3-4/group). (B) Flow cytometry gating strategy used for T cell analysis including evaluation of Treg and memory subsets. Graphs depict error bars based on standard deviation. Data are representative of at least two independent experiments. Unpaired student T test was used for assessments in (A). \*p < 0.05, \*\*p < 0.01, \*\*\*p < 0.001, \*\*\*\*p < 0.0001, ns, not significant.

A

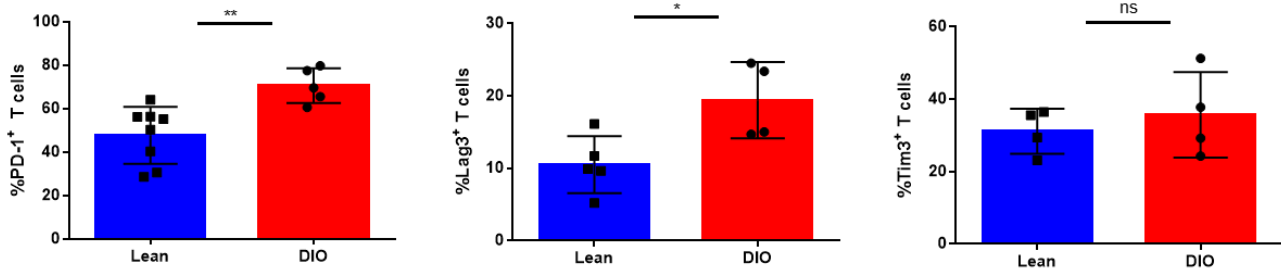

**Supplemental Figure 4: Effects of HFD on weight gain and metabolism over time.** (A) Flowcytometry assessment of exhaustion markers PD-1, Lag3 and Tim3 in the splenic T cells of nineteen-month-old C57BL/6 lean and DIO mice (n = 4-8/group). Graphs depict error bars based on standard deviation. Data are representative of at least two independent experiments. Unpaired student T test was used for assessments in (A). \*p < 0.05, \*\*p < 0.01, \*\*\*p < 0.001, \*\*\*\*p < 0.0001, ns, not significant.

Supplemental Table 1: Control Diet Bodyweight and Thymic Cellularity

| <u>Strain</u> | <u>Sex</u> | <u>Age (Months)</u> | <u>Diet</u> | <u>Bodyweight (grams)</u> | <u>Thymic Cellularity (10<sup>6</sup> Cells)</u> |
|---------------|------------|---------------------|-------------|---------------------------|--------------------------------------------------|
| C57BL/6       | Male       | 6                   | 10% Fat     | 43.6                      | 42.1225                                          |
| C57BL/6       | Male       | 6                   | 10% Fat     | 37.8                      | 40.4275                                          |
| C57BL/6       | Male       | 6                   | 10% Fat     | 42.3                      | 55.1                                             |
| C57BL/6       | Male       | 6                   | 10% Fat     | 33.5                      | 24.58                                            |
| C57BL/6       | Male       | 6                   | 10% Fat     | 38.3                      | 74.93                                            |
| C57BL/6       | Male       | 6                   | 10% Fat     | 31.8                      | 59.19                                            |
| C57BL/6       | Male       | 7                   | 10% Fat     | 30.6                      | 63.13                                            |
| C57BL/6       | Male       | 7                   | 10% Fat     | 30.8                      | 52.54                                            |
| C57BL/6       | Male       | 7                   | 10% Fat     | 41.3                      | 60.195                                           |
| C57BL/6       | Male       | 7                   | 10% Fat     | 47.5                      | 60.44                                            |
| C57BL/6       | Male       | 7                   | 10% Fat     | 38.6                      | 41.92                                            |
| C57BL/6       | Male       | 7                   | 10% Fat     | 38.5                      | 67.975                                           |
| C57BL/6       | Male       | 7                   | 10% Fat     | 47.8                      | 107.5                                            |
| C57BL/6       | Male       | 12                  | 10% Fat     | 48.4                      | 31.15                                            |
| C57BL/6       | Male       | 12                  | 10% Fat     | 45.6                      | 25.47                                            |
| C57BL/6       | Male       | 12                  | 10% Fat     | 38.8                      | 35.42                                            |
| C57BL/6       | Male       | 12                  | 10% Fat     | 45.4                      | 44.01                                            |
| C57BL/6       | Male       | 13                  | 10% Fat     | 38.5                      | 18.2725                                          |
| C57BL/6       | Male       | 13                  | 10% Fat     | 40.5                      | 29.3425                                          |
| C57BL/6       | Male       | 13                  | 10% Fat     | 45.2                      | 52.35                                            |
| C57BL/6       | Male       | 13                  | 10% Fat     | 46                        | 82.53                                            |
| C57BL/6       | Male       | 13                  | 10% Fat     | 50.2                      | 59.57                                            |
| C57BL/6       | Male       | 16                  | 10% Fat     | 42.8                      | 25.115                                           |
| C57BL/6       | Male       | 16                  | 10% Fat     | 45.8                      | 26.875                                           |
| C57BL/6       | Male       | 16                  | 10% Fat     | 43.8                      | 25.705                                           |
| C57BL/6       | Male       | 16                  | 10% Fat     | 47.2                      | 25.365                                           |
| C57BL/6       | Male       | 16                  | 10% Fat     | 51.6                      | 19.83                                            |
| C57BL/6       | Male       | 19                  | 10% Fat     | 52.6                      | 17.55                                            |
| C57BL/6       | Male       | 19                  | 10% Fat     | 48.5                      | 28.26                                            |
| C57BL/6       | Male       | 19                  | 10% Fat     | 44.4                      | 19.655                                           |

## Supplemental Table 2: HFD Bodyweight and Thymic Cellularity

| Strain  | Sex  | Age (Months) | Diet    | Bodyweight (grams) | Thymic Cellularity (10 <sup>6</sup> Cells) |
|---------|------|--------------|---------|--------------------|--------------------------------------------|
| C57BL/6 | Male | 6            | 60% Fat | 52.4               | 57.225                                     |
| C57BL/6 | Male | 6            | 60% Fat | 50.9               | 38.235                                     |
| C57BL/6 | Male | 6            | 60% Fat | 52.9               | 52.75                                      |
| C57BL/6 | Male | 6            | 60% Fat | 48.1               | 132.26                                     |
| C57BL/6 | Male | 6            | 60% Fat | 48.5               | 89.17                                      |
| C57BL/6 | Male | 6            | 60% Fat | 51.3               | 103.73                                     |
| C57BL/6 | Male | 7            | 60% Fat | 51.2               | 135.75                                     |
| C57BL/6 | Male | 7            | 60% Fat | 48.3               | 139.2                                      |
| C57BL/6 | Male | 7            | 60% Fat | 56.13              | 77.6                                       |
| C57BL/6 | Male | 7            | 60% Fat | 56.81              | 122.8                                      |
| C57BL/6 | Male | 7            | 60% Fat | 48.8               | 63.305                                     |
| C57BL/6 | Male | 7            | 60% Fat | 58.6               | 55.33                                      |
| C57BL/6 | Male | 7            | 60% Fat | 52.5               | 76.39                                      |
| C57BL/6 | Male | 12           | 60% Fat | 57.1               | 76.11                                      |
| C57BL/6 | Male | 12           | 60% Fat | 56.9               | 49.33                                      |
| C57BL/6 | Male | 12           | 60% Fat | 57.1               | 30.045                                     |
| C57BL/6 | Male | 12           | 60% Fat | 62                 | 42.395                                     |
| C57BL/6 | Male | 13           | 60% Fat | 67.5               | 23.38                                      |
| C57BL/6 | Male | 13           | 60% Fat | 64.6               | 58.775                                     |
| C57BL/6 | Male | 13           | 60% Fat | 58.4               | 41.19                                      |
| C57BL/6 | Male | 13           | 60% Fat | 69.8               | 49.78                                      |
| C57BL/6 | Male | 13           | 60% Fat | 61.4               | 41.21                                      |
| C57BL/6 | Male | 13           | 60% Fat | 62.3               | 33.81                                      |
| C57BL/6 | Male | 13           | 60% Fat | 55.9               | 69.24                                      |
| C57BL/6 | Male | 16           | 60% Fat | 59                 | 18.87                                      |
| C57BL/6 | Male | 16           | 60% Fat | 76.2               | 21.33                                      |
| C57BL/6 | Male | 16           | 60% Fat | 64.4               | 16.065                                     |
| C57BL/6 | Male | 16           | 60% Fat | 63.4               | 18.305                                     |
| C57BL/6 | Male | 16           | 60% Fat | 64.4               | 17.82                                      |
| C57BL/6 | Male | 19           | 60% Fat | 79.2               | 20.16                                      |
| C57BL/6 | Male | 19           | 60% Fat | 63.8               | 18.06                                      |
| C57BL/6 | Male | 19           | 60% Fat | 67.5               | 12.98                                      |
